# Supplementary material for: A chiral 2p–3d heterometallic azido complex with 2,6-pyridinedicarboxylate as the co-ligand showing magnetic order
Source: Royal Society of Chemistry journal article supplement (doi:10.1039/c3dt50835h), 2013-01-01
Supplement: c3dt50835h.pdf [file c3dt50835h.pdf]

## Electronic Supporting Information (ESI)

### Chiral 2p-3d heterometallic azido complex with 2,6-pyridinedicarboxylate as co-ligand showing magnetic order

Jiong-Peng Zhao, Qian Yang, Song-De Han, Jie Han, Ran Zhao, Bo-Wen Hu, and  
Xian-He Bu\*

**Table S1.** Selected bond lengths [Å] for complex **1**.

|                       |           |
|-----------------------|-----------|
| Co1—O1 <sup>i</sup>   | 1.981 (3) |
| Co1—N1                | 2.045 (3) |
| Co1—O4 <sup>ii</sup>  | 2.095 (3) |
| Co1—N2                | 2.148 (4) |
| Co1—O3                | 2.176 (2) |
| Co1—O2                | 2.221 (3) |
| Na1—O2 <sup>i</sup>   | 2.285 (2) |
| Na1—O2 <sup>v</sup>   | 2.285 (2) |
| Na1—O5                | 2.361 (8) |
| Na1—O5 <sup>iii</sup> | 2.361 (8) |
| Na1—O3 <sup>iii</sup> | 2.526 (3) |

Symmetry codes: (i)  $x+1/2, -y+3/2, -z+7/4$ ; (ii)  $-y+3/2, x-1/2, z+1/4$ ;  
(iii)  $-y+2, -x+2, -z+3/2$ ; (iv)  $x-1/2, -y+3/2, -z+7/4$ ; (v)  $y+1/2, -x+3/2, z-1/4$ .

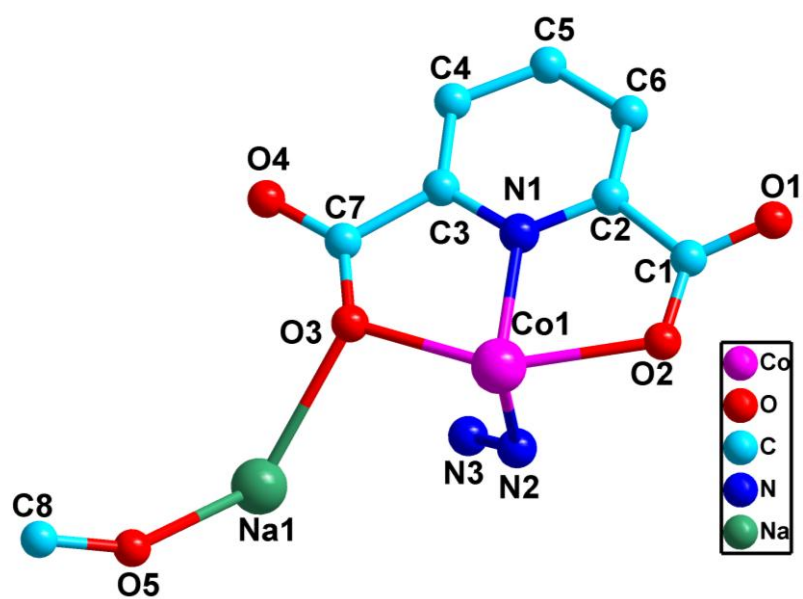

**Figure S1.** The asymmetry unit of complex **1**.

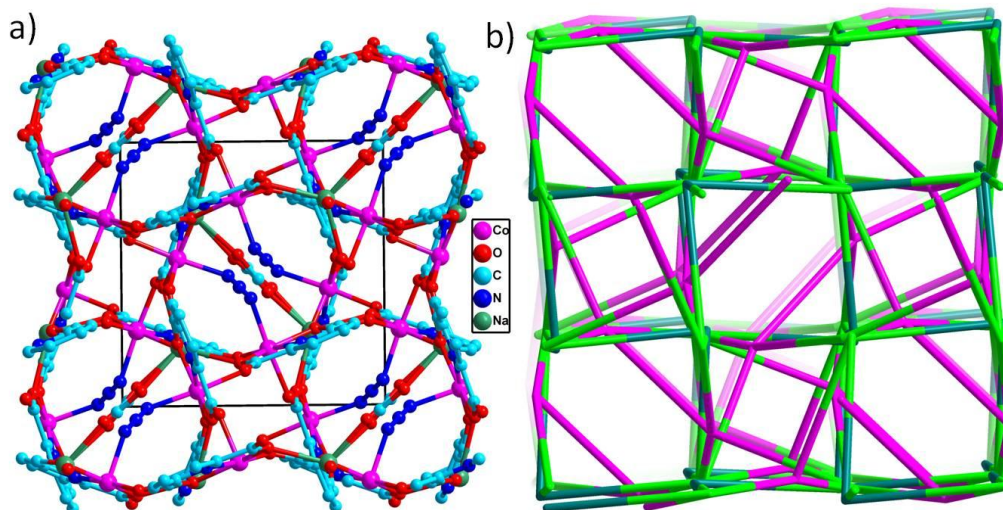

**Figure. S2** a) 3D view of the complex along *c* direction in **1**; b) 4,5-connected 3-nodal topology net in **1**.

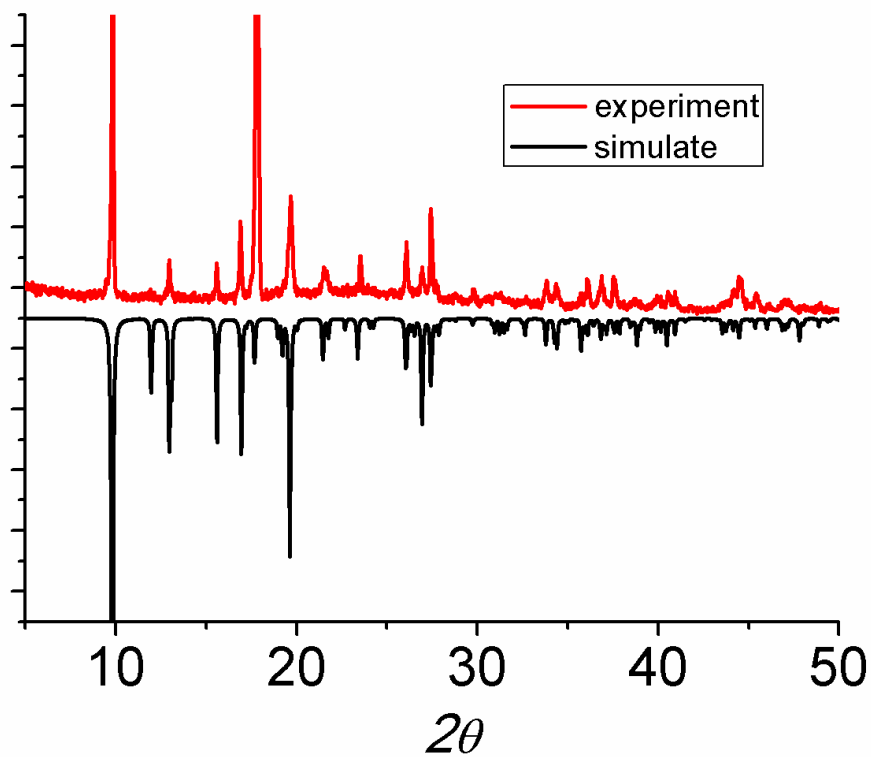

**Figure S3.** The XRPD diagram for complex 1.

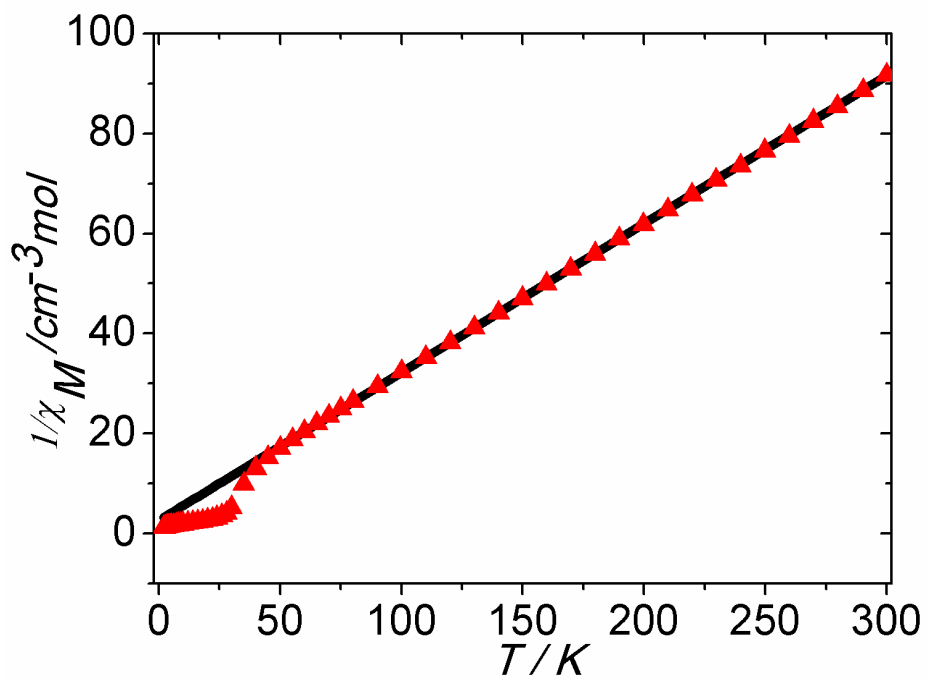

**Figure S4.** Curie plot for 1. The solid line is the best fit to the Curie-Weiss law.

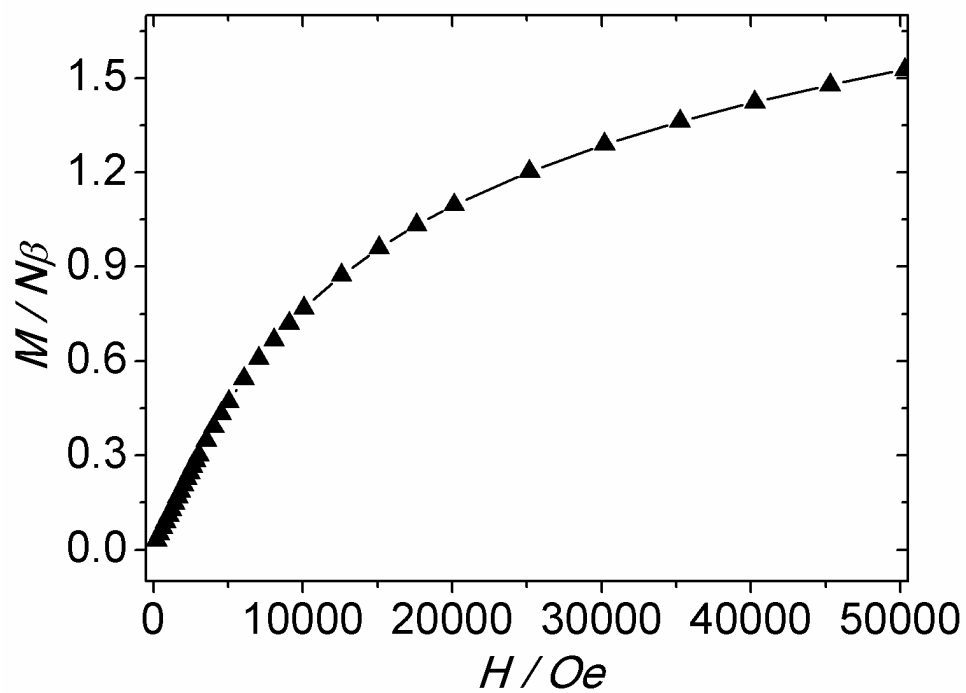

**Figure S5.** The magnetization curve at 2.0 K of **1**.
